# Supplementary material for: Tinnitus risk factors and its evolution over time
Source: Springer Nature journal article supplement (doi:10.1038/s41467-025-59445-3), 2025-05-07
Supplement: MOESM1 [file 41467_2025_59445_MOESM1_ESM.pdf]

# **Tinnitus risk factors and its evolution over time**

## **Supplementary materials**

L.Hobeika<sup>1,2,3,4</sup>, M.Fillingim<sup>3,5</sup>, C.Tanguay-Sabourin<sup>3,6,7</sup>, M.Roy<sup>3,4,6</sup>, A.Londero<sup>8</sup>, S.Samson<sup>1,9,10</sup>, E.Vachon-Preseu<sup>3,6,11</sup>

1. Université Paris Cité, Institut Pasteur, AP-HP, Inserm, CNRS, Fondation Pour l'Audition, Institut de l'Audition, IHU reConnect, F-75012 Paris, France
2. Sorbonne Université, Institut du Cerveau - Paris Brain Institute - ICM, Inserm, CNRS, APHP, Hôpital de la Pitié Salpêtrière, Paris, France
3. Alan Edwards Centre for Research on Pain, McGill University, Montreal, Quebec, Canada
4. Department of Psychology, McGill University, Montreal, Quebec, Canada.
5. Integrated Program in Neuroscience, McGill University, Montreal, Quebec, Canada
6. Department of Anesthesia, Faculty of Medicine and Health Sciences, McGill University, Montreal, Quebec, Canada.
7. Faculty of Medicine, Université de Montréal, Montreal, Quebec, Canada.
8. Université Paris Cité, Institut Pasteur, AP-HP, Hôpital Lariboisière, Service ORL, INSERM, Fondation Pour l'Audition, IHU reConnect, F-75010 Paris, France
9. PSITEC – Psychologie : Interactions, Temps, Emotions, Cognition, Université de Lille, ULR 4072, Lille, France
10. Assistance Publique – Hôpitaux de Paris, GHU Pitié-Salpêtrière-Charles Foix, F-75013 Paris, France
11. Faculty of Dental Medicine and Oral Health Sciences, McGill University, Montreal, Quebec, Canada.

**Figure S1: Features loadings (Pearson's  $r$  correlation coefficient between features and the models' scores) of the **A** Presence Risk Score model and **B** the Severity Risk Score model**

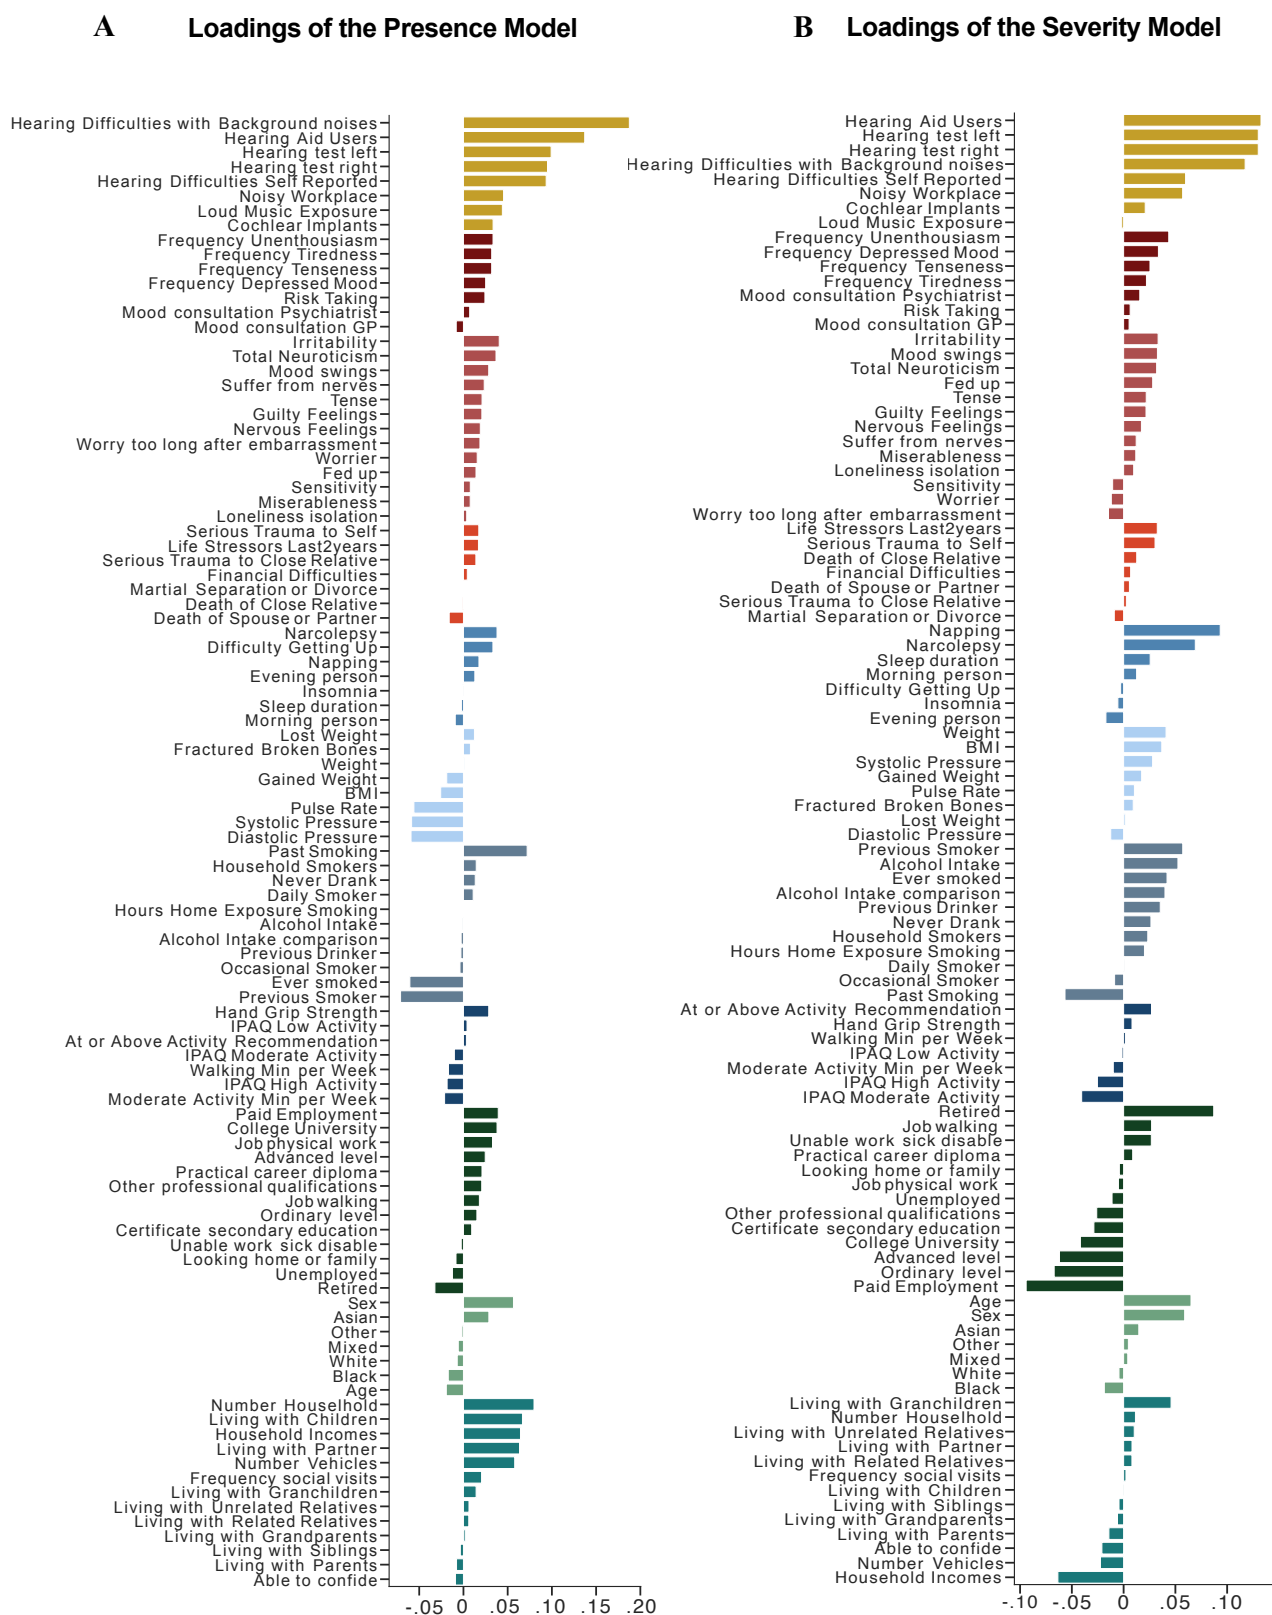

**Figure S2: Sex stratified analysis.** We tested the presence and severity models separately in women and men. Results did not evidenced differences in the cross-sectional or longitudinal analysis.

## Sex stratified analysis Presence model

Cross-sectional

Longitudinal

### Analysis in Women

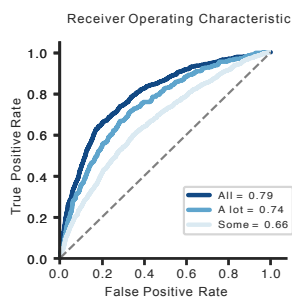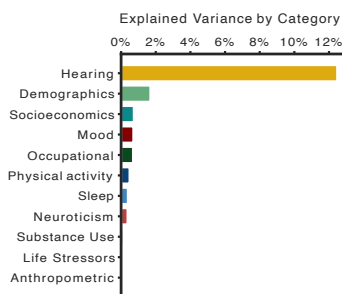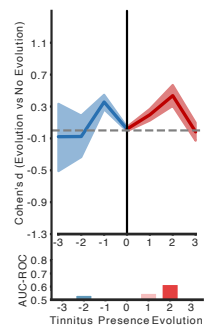

### Analysis in Men

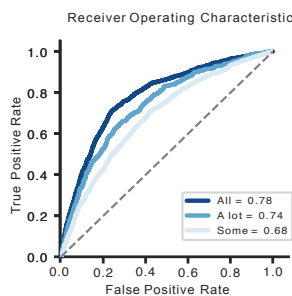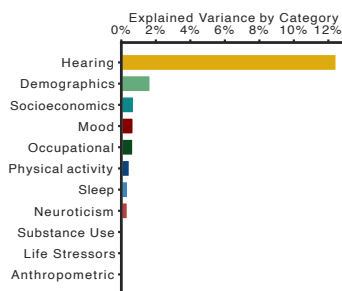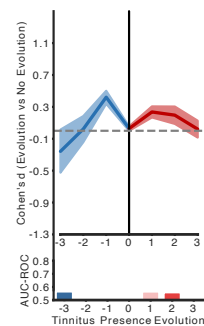

## Sex stratified analysis Severity model

Cross-sectional

Longitudinal

### Analysis in Women

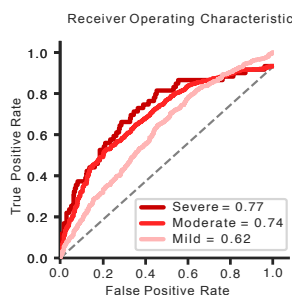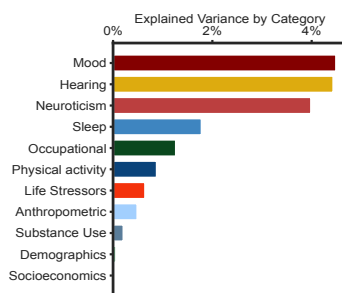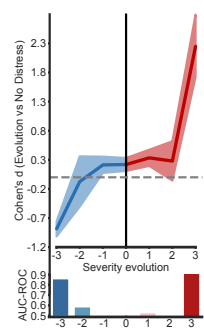

### Analysis in Men

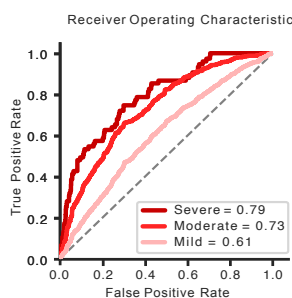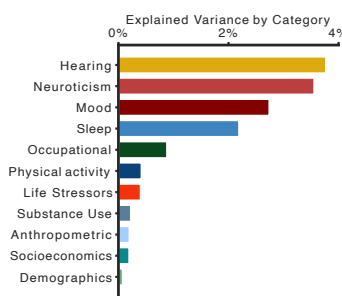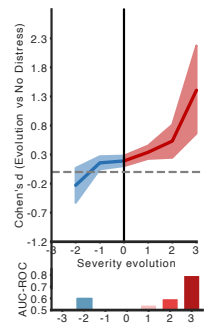

**Figure S3: Validation of the presence and severity risk scores over ethnicities.**

To ensure the validity of the presence and severity models on different ethnicities, we tested the performances of the models separately on groups of Asian, Black and White individuals. We tested participants which were not included in the rest of the analysis, using data of participants who did not had a full hearing evaluation at baseline visit but had one in the follow-up visit. We tested 498 Asian, 250 Black and 28,841 White individuals with the presence model, and 99 Asian, 41 Black and 6,934 White individuals with the severity model. The presence model **(A)** had good to excellent performances to classify individuals perceiving tinnitus a lot or all the time (except for the Asian “a lot of the time” group). The severity model **(B)** had good to excellent performances to classify individuals with moderate or severe distress (except for the Asian “moderate” group). Overall, the models had good performances for the extreme levels (all the time, or severe distress) for all ethnicities. The performances for the intermediate levels (A lot of the time, moderate distress) were good for Black and White individuals, but low for Asian. Those results should be replicated on larger groups of individuals.

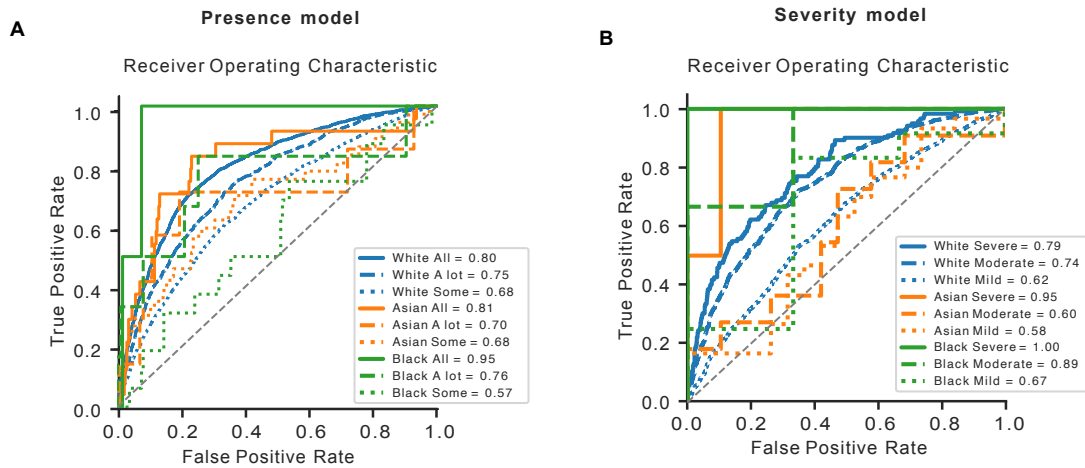

**Figure S4:** Odd ratios of tinnitus presence and tinnitus severity at follow-up, depending respectively on tinnitus presence and tinnitus severity at baseline

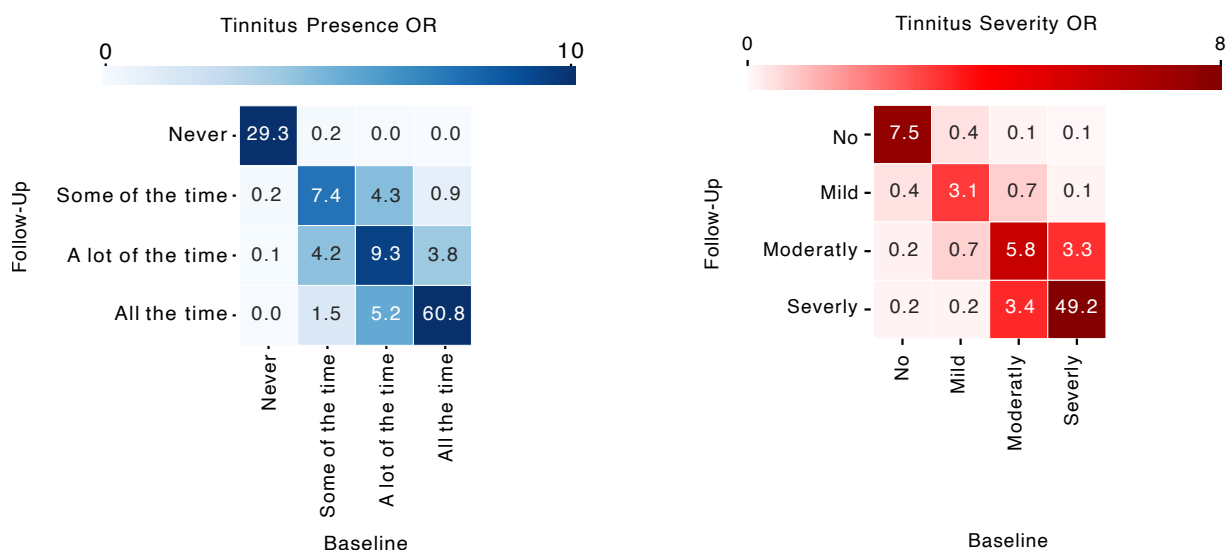

**Table S1:** Number of participants in longitudinal dataset. The table depicts the number of participants for each combination of tinnitus presence at the baseline visit, and tinnitus presence at the follow-up visit

|                       |                      | Presence at baseline |                  |                   |                      |
|-----------------------|----------------------|----------------------|------------------|-------------------|----------------------|
|                       |                      | No                   | Some of the time | A lot of the time | Most or all the time |
| Presence at follow-up | No                   | 19,483               | 1,005            | 115               | 100                  |
|                       | Some of the time     | 1,293                | 894              | 247               | 171                  |
|                       | A lot of the time    | 299                  | 264              | 180               | 196                  |
|                       | Most or all the time | 587                  | 330              | 280               | 1,430                |

**Table S2:** Number of participants in longitudinal dataset. The table depicts the number of participants for each combination of tinnitus severity at the baseline visit, and tinnitus severity at the follow-up visit

|                       |          | Severity at baseline |      |          |        |
|-----------------------|----------|----------------------|------|----------|--------|
|                       |          | No                   | Mild | Moderate | Severe |
| Severity at follow-up | No       | 983                  | 587  | 64       | 3      |
|                       | Mild     | 530                  | 1705 | 390      | 17     |
|                       | Moderate | 75                   | 384  | 387      | 50     |
|                       | Severe   | 9                    | 20   | 57       | 58     |

**Figure S5: Adjustment of the risk scores for the longitudinal evaluations.**

We examined the prognostic value of the severity risk score by correcting for the severity at baseline. To this aim, we regressed out the squared values of the tinnitus presence level (0: No, 1: Some of the time, 2: A lot of the time, 3: All of the time) at baseline from presence the risk score calculated at baseline. Making the score orthogonal to the Tinnitus presence level at baseline allowed us to interpret interindividual deviations in this adjusted score as risk of recovery or worsening of tinnitus presence at the follow-up visit. Similar analysis was performed on the severity risk score with the levels 0: No, 1: Mild, 2: Moderate and 3: Severe). The process is depicted in the following figure.

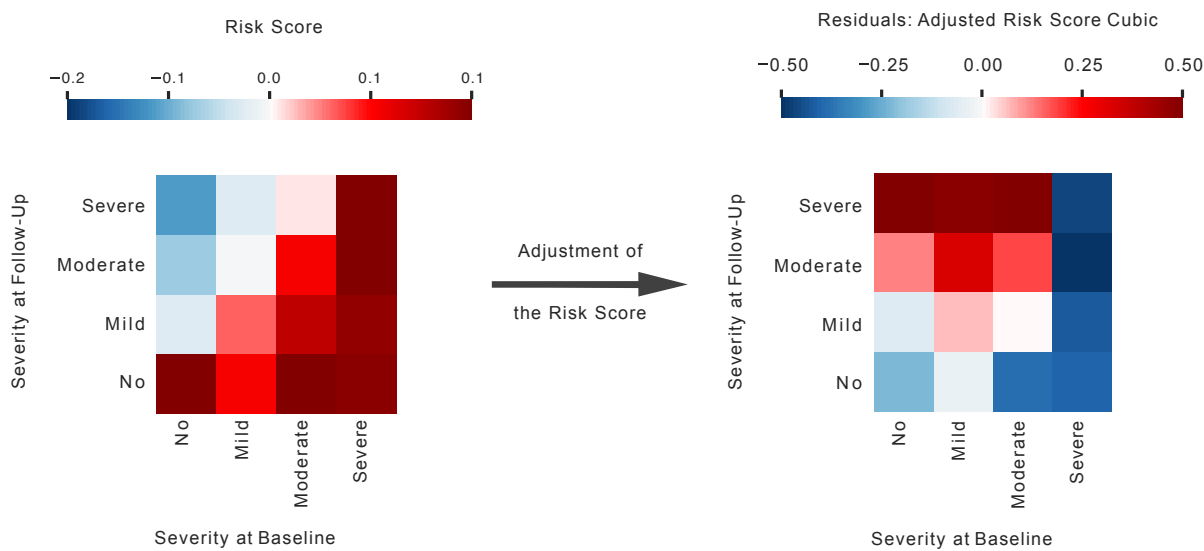

**Figure S6. Examining the severity at follow-up depending on the reduced risk score at baseline**

This figure depicts the odd ratios of experiencing a severe, moderate, mild or no distress associated with tinnitus at the follow-up visit, depending on the Reduced risk score at baseline. Based on those odd ratios, we can conclude that 0 and 1 risk scores are associated with a low risk of experiencing moderate or severe tinnitus over time. Scores 2 and 3 are associated with a moderate risk, score 4 and 5 are associated with a large risk and score 6 with a very high risk of experiencing moderate or severe tinnitus distress over time.

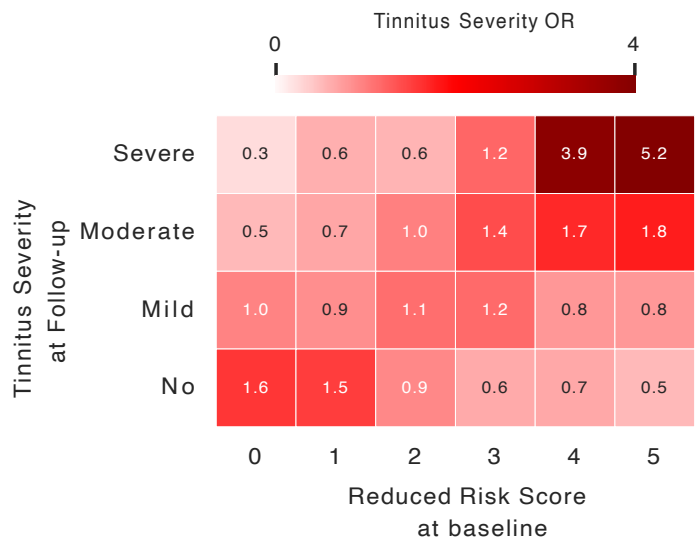

**Figure S7:** Flowchart describing the constitution of the presence model and the severity model datasets.

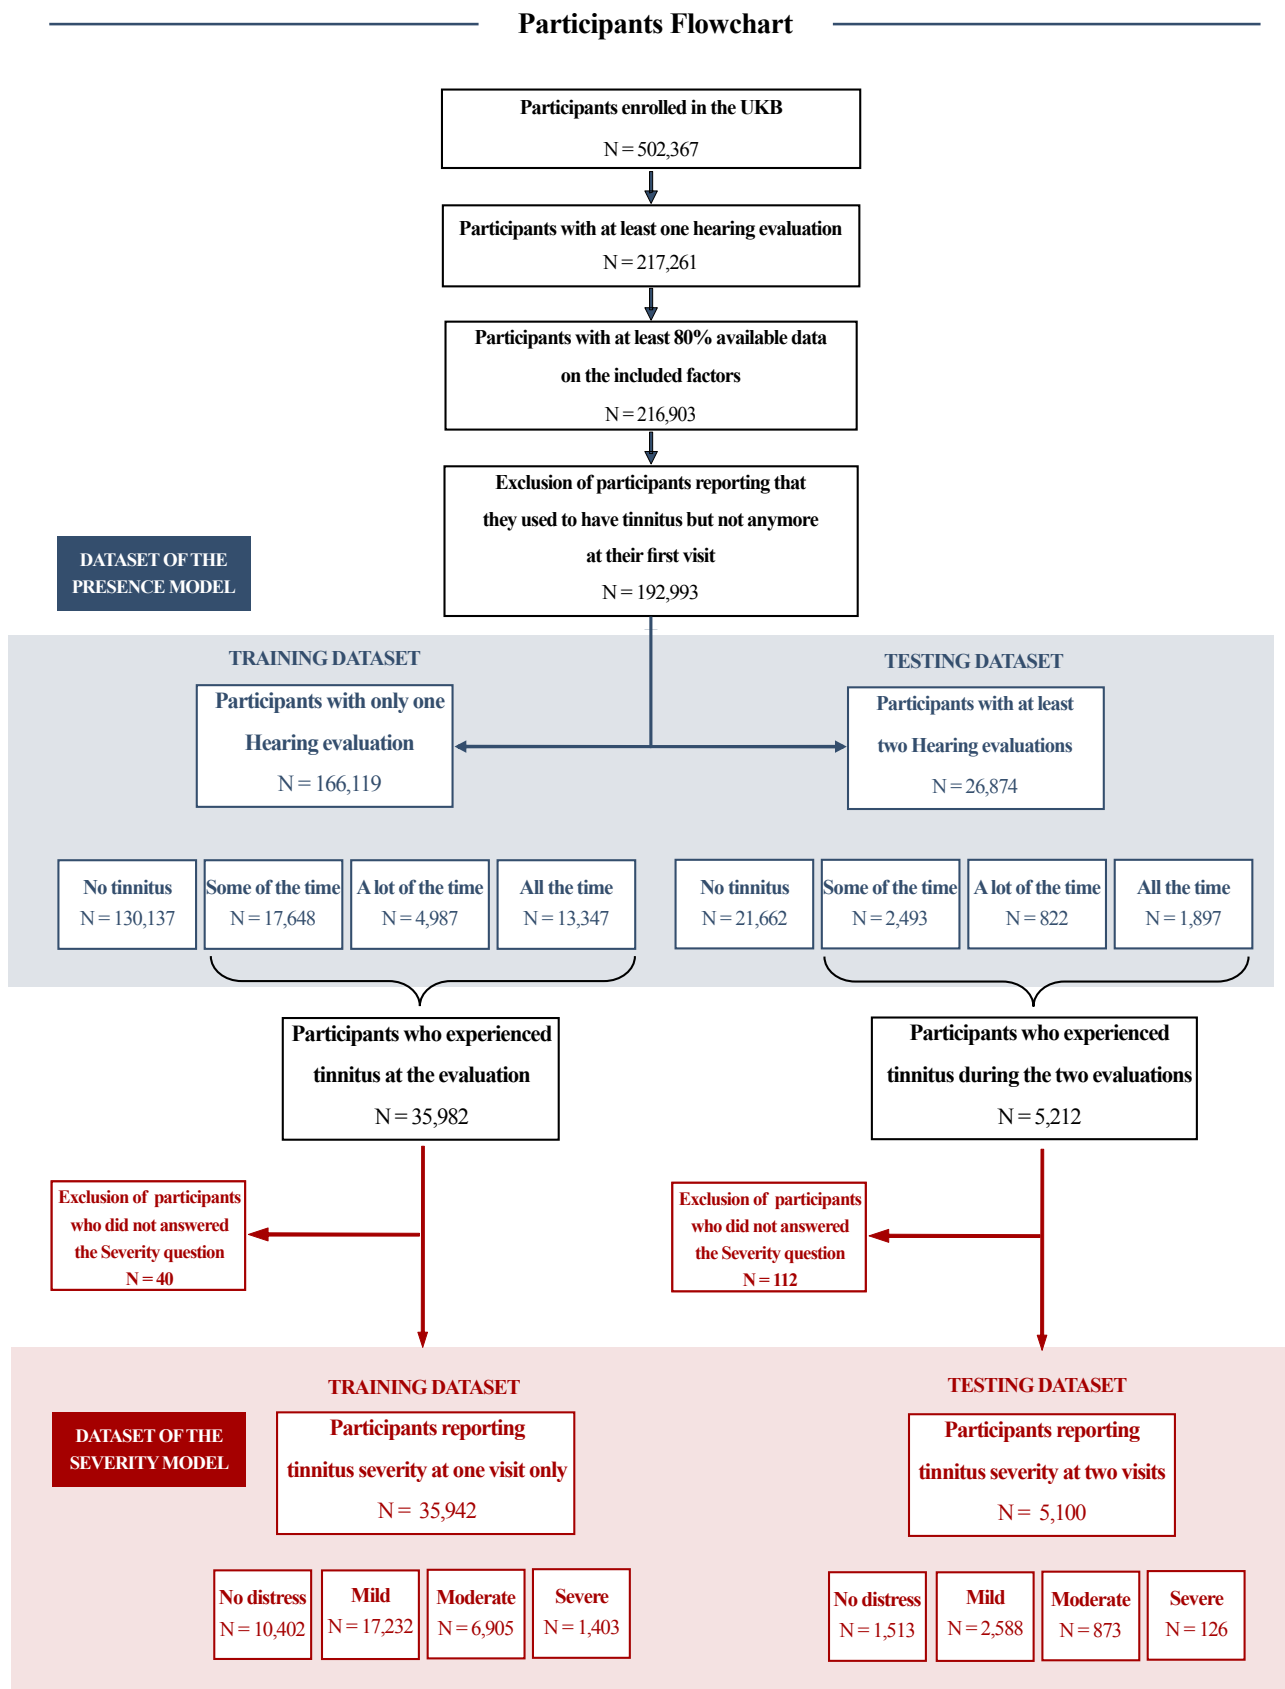

**Tables S3: Constitution of the dataset of 217,261 participants out of the 502,367 participants of the UK Biobank.**

The UK Biobank is constituted of one baseline visit (T0, n = 502,367 participants) and three follow-up visits for which a different subset of participants was included (T1: n = 20,343 participants, T2: n = 65,655 participants and T3: n = 5,357 participants). Hearing evaluation was not included in the dataset at the start of the data collection, thus only a sub-sample of participants at T0 were evaluated for their audition. To add as many participants as possible in our analysis, we added data of all participants who had at least one hearing evaluation in one of the visits. Table **A** describes the number of participants included in our analysis who had **only one** hearing evaluation. We described the visit of the UK Biobank at which they received this evaluation. If a participant had **at least two** hearing evaluations, we included the longitudinal evaluation in our dataset. Table **B** describes the number of participants who received at least two hearing evaluation, and at which UK Biobank visits they were performed. When participants had 3 or 4 hearing evaluations, we always kept the older evaluation as baseline, and the one following as a follow-up. For example, if a participant was evaluated at T0, T2 and T3, we included his evaluation at T0 as the baseline evaluation, and T2 as the follow-up evaluation.

Data at T0 were collected between April 2009 and October 2010. Data at T1 were collected between August 2012 and June 2013. Data at T2 were collected between April 2014 and march 2023. Finally, data at T3 were collected between June 2019 and February 2023

**A. Number of participants with only one hearing evaluation**

| Visit |         |
|-------|---------|
| T0    | 145,025 |
| T1    | 8,631   |
| T2    | 33,544  |
| T3    | 47      |

**B. Number of participants with at least two hearing evaluations**

|                           |    | Second visit (Follow-up) |        |    |
|---------------------------|----|--------------------------|--------|----|
|                           |    | T1                       | T2     | T3 |
| First visit<br>(Baseline) | T0 | 4,625                    | 18,568 | 20 |
|                           | T1 |                          | 6,791  | 10 |
|                           | T2 |                          |        | 0  |
|                           | T3 |                          |        |    |



**Table S4:** Variables extracted from the UK Biobank and their associated data field.

| Type of measure                                              | Details                                                                                                                                                                      | UK Biobank Data Field |
|--------------------------------------------------------------|------------------------------------------------------------------------------------------------------------------------------------------------------------------------------|-----------------------|
| Tinnitus evaluation                                          |                                                                                                                                                                              |                       |
| Tinnitus                                                     |                                                                                                                                                                              | <u>4803</u>           |
| Tinnitus severity/nuisance                                   |                                                                                                                                                                              | <u>4814</u>           |
| Hearing                                                      |                                                                                                                                                                              |                       |
| Hearing difficulties self-reported                           |                                                                                                                                                                              | <u>2247</u>           |
| Hearing difficulties self-reported with background noise     |                                                                                                                                                                              | <u>2257</u>           |
| Hearing test right ear                                       |                                                                                                                                                                              | <u>20021</u>          |
| Hearing test left ear                                        |                                                                                                                                                                              | <u>20019</u>          |
| Hearing aid                                                  |                                                                                                                                                                              | <u>3393</u>           |
| Cochlear implants                                            |                                                                                                                                                                              | <u>4792</u>           |
| Noisy workplace                                              |                                                                                                                                                                              | <u>4825</u>           |
| Loud music exposure                                          |                                                                                                                                                                              | <u>4836</u>           |
| Mood                                                         |                                                                                                                                                                              |                       |
| Frequency of depressed mood in last 2 weeks                  |                                                                                                                                                                              | <u>2050</u>           |
| Frequency of unenthusiasm/disinterest in last 2 weeks        |                                                                                                                                                                              | <u>2060</u>           |
| Frequency of tenseness/restlessness in last 2 weeks          |                                                                                                                                                                              | <u>2070</u>           |
| Frequency of tiredness/lethargy in last 2 weeks              |                                                                                                                                                                              | <u>2080</u>           |
| Seen doctor (GP) for nerves, anxiety, tension or depression  |                                                                                                                                                                              | <u>2090</u>           |
| Seen psychiatrist for nerves, anxiety, tension or depression |                                                                                                                                                                              | <u>2100</u>           |
| Risk taking                                                  | Whether the participant describes themselves as someone who takes risks                                                                                                      | <u>2040</u>           |
| Neuroticism                                                  |                                                                                                                                                                              |                       |
| Neurotic behaviors                                           | Mood swings                                                                                                                                                                  | <u>1920</u>           |
|                                                              | Miserableness                                                                                                                                                                | <u>1930</u>           |
|                                                              | Irritability                                                                                                                                                                 | <u>1940</u>           |
|                                                              | Sensitivity/hurt feelings                                                                                                                                                    | <u>1950</u>           |
|                                                              | Fed-up feelings                                                                                                                                                              | <u>1960</u>           |
|                                                              | Nervous feelings                                                                                                                                                             | <u>1970</u>           |
|                                                              | Worrier/anxious feelings                                                                                                                                                     | <u>1980</u>           |
|                                                              | Tens/highly strung                                                                                                                                                           | <u>1990</u>           |
|                                                              | Worry too long after embarrassment                                                                                                                                           | <u>2000</u>           |
|                                                              | Suffer from nerves                                                                                                                                                           | <u>2010</u>           |
|                                                              | Loneliness                                                                                                                                                                   | <u>2020</u>           |
|                                                              | Guilty feeling                                                                                                                                                               | <u>2030</u>           |
| Total neuroticism score                                      | Derived from the 12 neurotic behaviors, as a sum score of the total “yes” answers to these questions                                                                         | <u>20127</u>          |
| Life stressors                                               |                                                                                                                                                                              |                       |
| Serious illness, injury, bereavement in the last 2 years     | Serious trauma to self<br>Serious trauma to close relative<br>Death of close relative<br>Death of spouse or partner<br>Marital separation/ divorce<br>Financial difficulties | <u>6145</u>           |
| Life stressors within last 2 years                           | Derived from the life stressors 6145, as a sum score of the total “yes” answers to these questions                                                                           | -                     |
| Sleep                                                        |                                                                                                                                                                              |                       |
| Sleep duration                                               | Hours of sleep in every 24 hours                                                                                                                                             | <u>1160</u>           |

|                                            |                                                                                                                                                           |                    |
|--------------------------------------------|-----------------------------------------------------------------------------------------------------------------------------------------------------------|--------------------|
| Getting up in the morning                  | Difficulty getting up                                                                                                                                     | <u>1170</u>        |
| Sleeplessness/insomnia                     | Trouble falling asleep at night or waking up in the middle of the night                                                                                   | <u>1200</u>        |
| Nap during the day                         |                                                                                                                                                           | <u>1190</u>        |
| Chronotype                                 | Late chronotype (evening person)<br>Early chronotype (morning person)                                                                                     | <u>1180</u>        |
| Daytime dozing (narcolepsy)                | Likely to doze off or fall asleep during the daytime                                                                                                      | <u>1220</u>        |
| Physical activity                          |                                                                                                                                                           |                    |
| Hand grip strength                         | Average between left- and right-hand grip strength (units of measurement: Kg).                                                                            | <u>46 &amp; 47</u> |
| IPAQ activity group                        | Low<br>Moderate<br>High                                                                                                                                   | <u>22032</u>       |
| MET minutes per week for walking           | Units of measurement: minutes/week                                                                                                                        | <u>22037</u>       |
| MET minutes per week for moderate activity | Units of measurement: minutes/week                                                                                                                        | <u>22038</u>       |
| Above moderate/vigorous recommendation     | Indicates if the participant met the 2017 UK Physical activity guidelines of 150 minutes of moderate activity per week or 75 minutes of vigorous activity | <u>22035</u>       |
| Substance Use                              |                                                                                                                                                           |                    |
| Smoking status                             | Previous smoker                                                                                                                                           | <u>20116</u>       |
| Current tobacco smoking                    | Daily smoker<br>Occasional smoker                                                                                                                         | <u>1239</u>        |
| Past tobacco smoking                       | How often the participant smoked tobacco in the past                                                                                                      | <u>1249</u>        |
| Ever smoked                                | Derived from current and past tobacco smoking status (data fields 1239 & 1249)                                                                            | <u>20160</u>       |
| Smokers in household                       | If anyone smokes in the participant's household                                                                                                           | <u>1259</u>        |
| Hours of exposure to tobacco at home       | Hours per week                                                                                                                                            | <u>1269</u>        |
| Alcohol drinker status                     | Never drank<br>Previous drinker                                                                                                                           | <u>20117</u>       |
| Alcohol intake frequency                   |                                                                                                                                                           | <u>1558</u>        |
| Alcohol intake vs. 10 years previously     | Indicates the change in the participant's alcohol use compared to 10 years ago                                                                            | <u>1628</u>        |
| Anthropometric                             |                                                                                                                                                           |                    |
| Body mass index (BMI)                      | Constructed from height and weight measured during the in-person assessment visit                                                                         | <u>21001</u>       |
| Weight change compared with one year ago   | Gained weight<br>Lost weight                                                                                                                              | <u>2306</u>        |
| Weight                                     | Unit of measurement: kg                                                                                                                                   | <u>21002</u>       |
| Systolic blood pressure                    | Units of measurement: mmHg                                                                                                                                | <u>4080</u>        |
| Diastolic blood pressure                   | Units of measurement: mmHg                                                                                                                                | <u>4079</u>        |
| Pulse rate                                 | Pulse rate measured during the automated blood pressure readings (units of measurement: bpm).                                                             | <u>102</u>         |
| Fractured/broken bones in last 5 years     |                                                                                                                                                           | <u>2463</u>        |
| Occupational                               |                                                                                                                                                           |                    |
| Job involves heavy manual or physical work |                                                                                                                                                           | <u>816</u>         |
| Job involves walking or standing           |                                                                                                                                                           | <u>806</u>         |
| Current employment status                  | Looking after home or family<br>Paid employment/self-employed<br>Retired<br>Unemployed<br>Unable to work or disable                                       | <u>6142</u>        |
| Education (qualifications)                 | College or university<br>Advanced level                                                                                                                   | <u>6138</u>        |

|                                              |                                                                                                                                                                                                                         |              |
|----------------------------------------------|-------------------------------------------------------------------------------------------------------------------------------------------------------------------------------------------------------------------------|--------------|
|                                              | Ordinary level<br>Certificate secondary education<br>Practical career diploma<br>Other professional qualifications                                                                                                      |              |
| Demographics                                 |                                                                                                                                                                                                                         |              |
| Ethnic background                            | White<br>Asian<br>Black<br>Mixed<br>Other                                                                                                                                                                               | <u>21000</u> |
| Sex                                          | Female / Male                                                                                                                                                                                                           | <u>31</u>    |
| Age                                          | Age in years                                                                                                                                                                                                            | <u>21003</u> |
| Socioeconomics                               |                                                                                                                                                                                                                         |              |
| Number in household                          | Number of people living together in participant's household including themselves                                                                                                                                        | <u>709</u>   |
| Relationship with people living in household | Living with partner<br>Living with children<br>Living with siblings<br>Living with parents<br>Living with grandparents<br>Living with grandchildren<br>Living with related relatives<br>Living with unrelated relatives | <u>6141</u>  |
| Frequency of friends and family visits       |                                                                                                                                                                                                                         | <u>1031</u>  |
| Able to confide                              | How often the participant has been able to confide to someone close to them                                                                                                                                             | <u>2110</u>  |
| Number of vehicles in household              |                                                                                                                                                                                                                         | <u>728</u>   |
| Average total household income               |                                                                                                                                                                                                                         | <u>738</u>   |

**Figure S8:** Comparison of two data imputation techniques: the median imputation and the Bayesian imputation method. We compared the accuracy of the presence (A) and severity (B) models depending on the data imputation methods, as well as the weights attributed to the features. We observe that the data imputation method did not significantly modify the models' accuracy, nor the weights attributed to each feature.

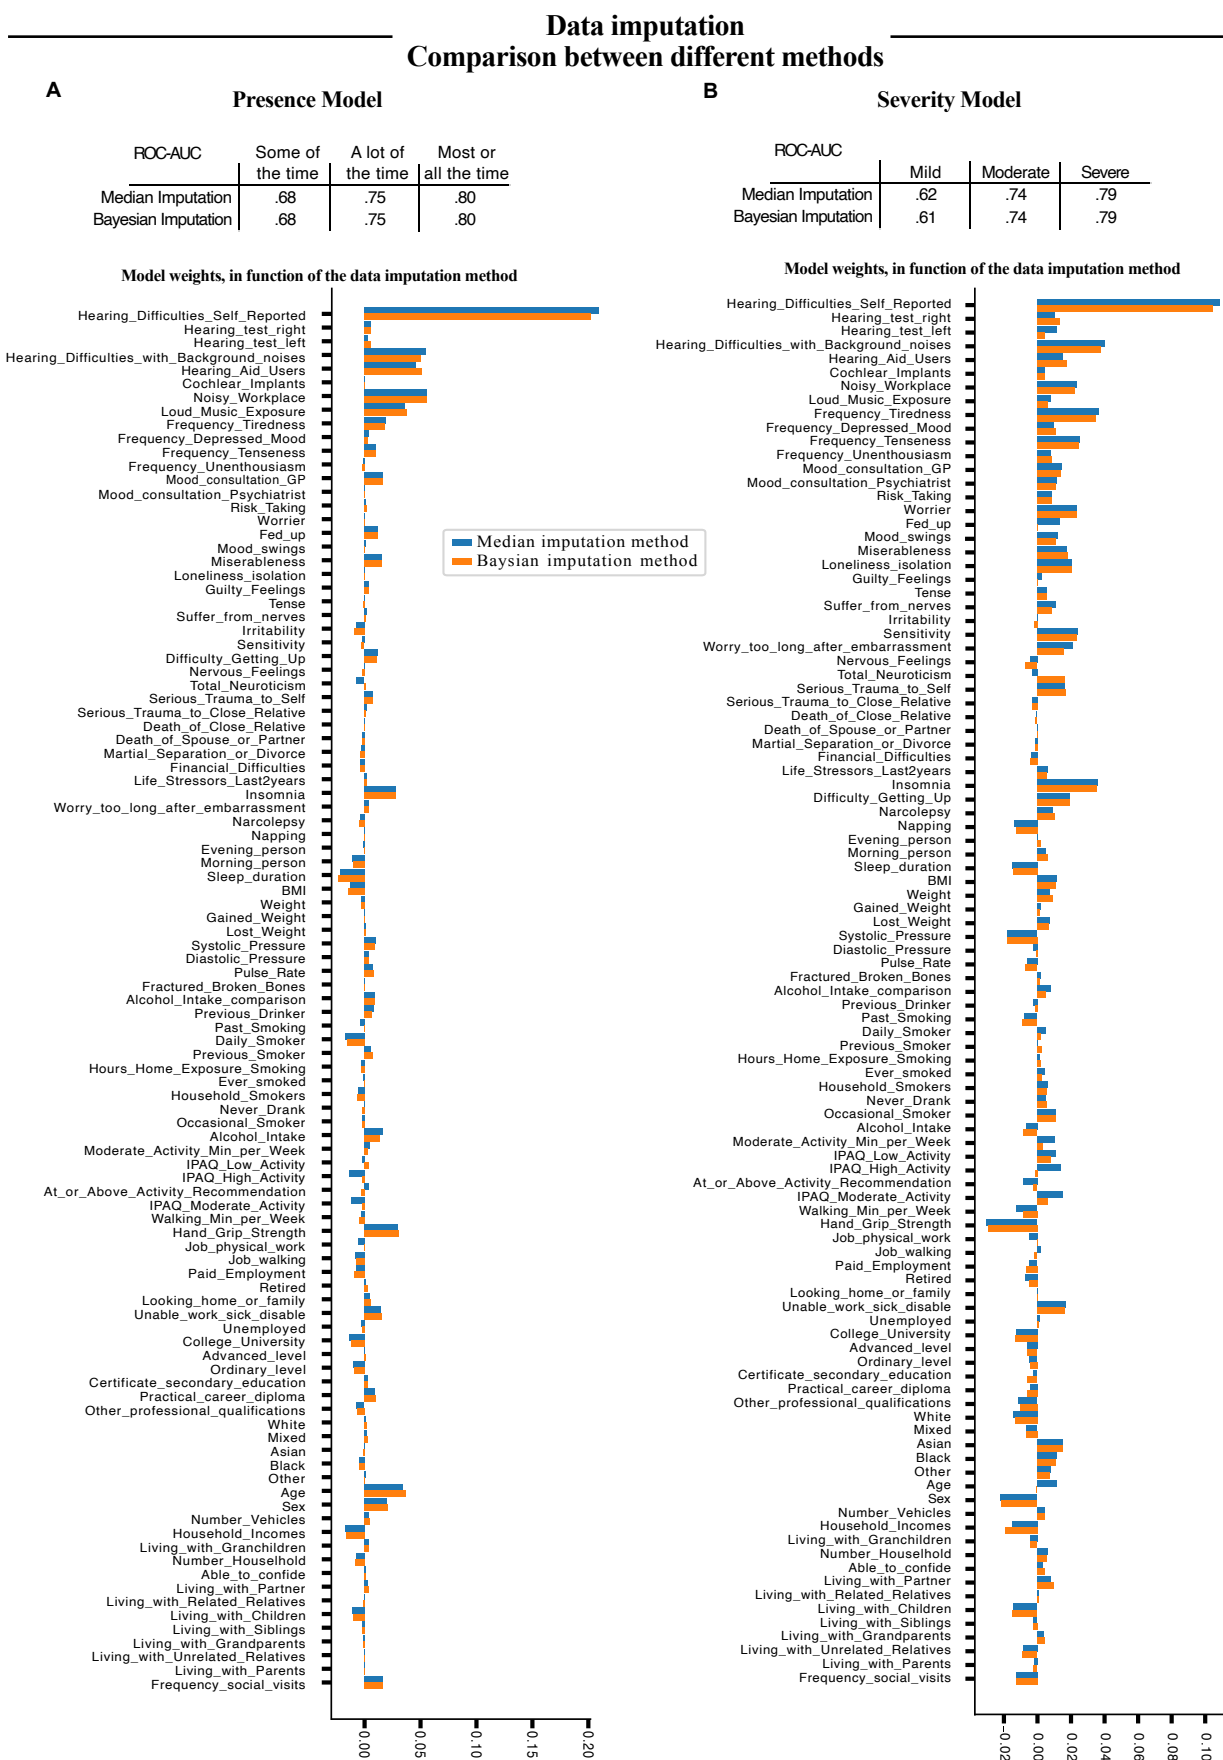

### Supplementary Note S1. Developing the predictive models predicting tinnitus presence and severity

The nonlinear iterative partial least square (NIPALS) method was trained within the discovery dataset to identify latent scores (**E** and **Z**) and loadings (**P** and **H**) that maximize the covariance between matrix of standardized psychosocial features ( $X_i$ ) (size (147385, 101) for tinnitus presence, and (43983, 101) for tinnitus severity) and a vector of self-reported tinnitus presence or severity (**Y**) (size (147385, 1) for tinnitus presence, and (43983, 1) for tinnitus severity):

1. Compute singular vectors  $\mu, v$  (weights) of covariance matrix  $C = X^T Y$
2. Obtain the latent scores **E** and **Z** by projecting  $X$  and **Y** onto singular vectors  $\mu$  and  $v$
3. Compute loadings **P** and **H** by iteratively regressing  $X$  onto **E** (power iteration)
4. 4. Deflate  $X$  and **Y** using  $X + 1 = X - E P^T$  and  $Y + 1 = Y - Z H^T$ , respectively
5. 5. Fit training (discovery) data  $X$  using the projection matrix **P** to obtain latent space  $\bar{x}$  so that  $\bar{x} = X P$
6. Use the latent space to predict left-out data  $Y_v$  (size (20853,1) for tinnitus presence, (4291,1) for tinnitus severity) using the coefficient matrix  $\beta \in R^{d \times t}$   $\beta$  such that  $Y_v = X_v \beta$ , where  $X_v$  denotes the matrix of psychosocial features in the validation set ( $X_v$  size (20853,101) for tinnitus presence, (4291,101) for tinnitus severity)

Further information on the implementation can be found at [https://scikit-learn.org/stable/modules/cross\\_decomposition.html#cross-decomposition](https://scikit-learn.org/stable/modules/cross_decomposition.html#cross-decomposition).

### Supplementary Note S2. Reduced risk score replication: TRI Database

The reduced severity risk score was derived using six binarized items:

1. **Do you think you have a hearing problem?** 0: No / 1: Yes
2. **Do you have a problem tolerating sounds because they often seem much too loud? That is, do you often find too loud or hurtful sounds which other people around you find quite comfortable?** 0: No, 0: Rarely, 0: Sometimes / 1: Usually, 1: Always
3. **How much of the time have you had trouble sleeping at night?** 0: At no time, 0: Some of the time, 0: Slightly less than half the time, 0: Slightly more than half the time/ 1: Most of the time, 1: All the time
4. **How much of the time have you felt lacking in energy and strength?** 0: At no time, 0: Some of the time, 0: Slightly less than half the time, 0: Slightly more than half the time/ 1: Most of the time, 1: All the time
5. **How much of the time have you felt low in spirits or sad?** 0: At no time, 0: Some of the time, 0: Slightly less than half the time, 0: Slightly more than half the time/ 1: Most of the time, 1: All the time
6. **How much of the time have you had a bad conscience or feelings of guilt?** 0: At no time, 0: Some of the time, 0: Slightly less than half the time, 0: Slightly more than half the time/ 1: Most of the time, 1: All the time

The TRI database did not contain information on speech-in-noise hearing difficulties, which could be a proper equivalent of the original item “Do you find it difficult to follow a conversation if there is background noise (such as TV, radio, children playing)?”. We replaced it by an evaluation of hyperacusis, i.e. hypersensitivity to sounds, a symptom often linked to tinnitus and hearing deficits as speech-in-noise hearing deficits. Questions 5) and 6) of the questionnaire POST were replaced here by other items evaluating mental health.
